# Supplementary material
Source: PubMed Central journal article supplement (PMC4672910)
Supplement: nn507241v_si_001.pdf [file nn507241v_si_001.pdf]

# Supporting Information

## ***In Vivo* Tumor Vasculature Targeting of CuS@MSN Based Theranostic Nanomedicine**

*Feng Chen,<sup>1,6</sup> Hao Hong,<sup>1,6</sup> Shreya Goel,<sup>2</sup> Stephen A. Graves,<sup>3</sup> Hakan Orbay,<sup>1</sup> Emily B. Ehlerding,<sup>3</sup> Sixiang Shi,<sup>2</sup> Charles P. Theuer,<sup>4</sup> Robert J. Nickles,<sup>3</sup> Weibo Cai<sup>\*1,2,3,5</sup>*

<sup>1</sup> Department of Radiology, University of Wisconsin - Madison, WI, USA

<sup>2</sup> Materials Science Program, University of Wisconsin - Madison, WI, USA

<sup>3</sup> Department of Medical Physics, University of Wisconsin - Madison, WI, USA

<sup>4</sup> TRACON Pharmaceuticals, Inc., San Diego, CA, USA

<sup>5</sup> University of Wisconsin Carbone Cancer Center, Madison, WI, USA

<sup>6</sup> Feng Chen and Hao Hong contributed equally to this work

## Supplementary Figures

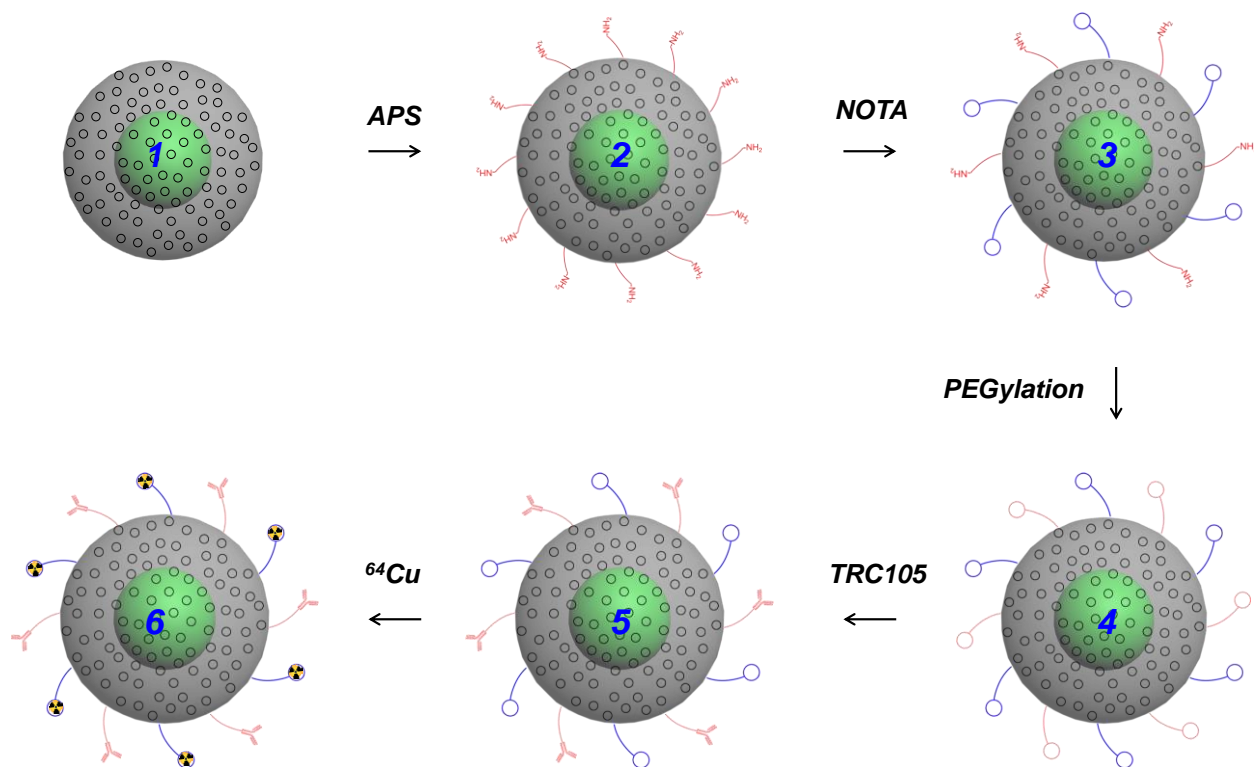

**Figure S1. Surface engineering of  $^{64}\text{Cu}$ -CuS@MSN-TRC105.** As-synthesized CuS@MSN (**1**) was first surface modified with (3-Aminopropyl)triethoxysilane (APS) to form amino groups conjugated CuS@MSN-NH<sub>2</sub> (**2**) before further bio-conjugations. p-SCN-Bn-NOTA, a well-known  $^{64}\text{Cu}$  chelator, was then conjugated to form NOTA-CuS@MSN-NH<sub>2</sub> (**3**). Afterward, nanoconjugate was PEGylated with SCM-PEG<sub>5k</sub>-Mal to render its stability in biological buffers (e.g. PBS), forming NOTA-CuS@MSNPEG<sub>5k</sub>-Mal (**4**). Then, thiolated anti-CD105 antibody (i.e. TRC105-SH) was conjugated to the nanoparticle to obtain NOTA-CuS@MSN-PEG<sub>5k</sub>-TRC105 (**5**). Lastly, PET isotope  $^{64}\text{Cu}$  ( $t_{1/2}=12.7$  h) was used to label the nanoparticle, forming  $^{64}\text{Cu}$ -NOTA-CuS@MSN-PEG<sub>5k</sub>-TRC105 (**6**), or short for  $^{64}\text{Cu}$ -CuS@MSN-TRC105 for clarity considerations.

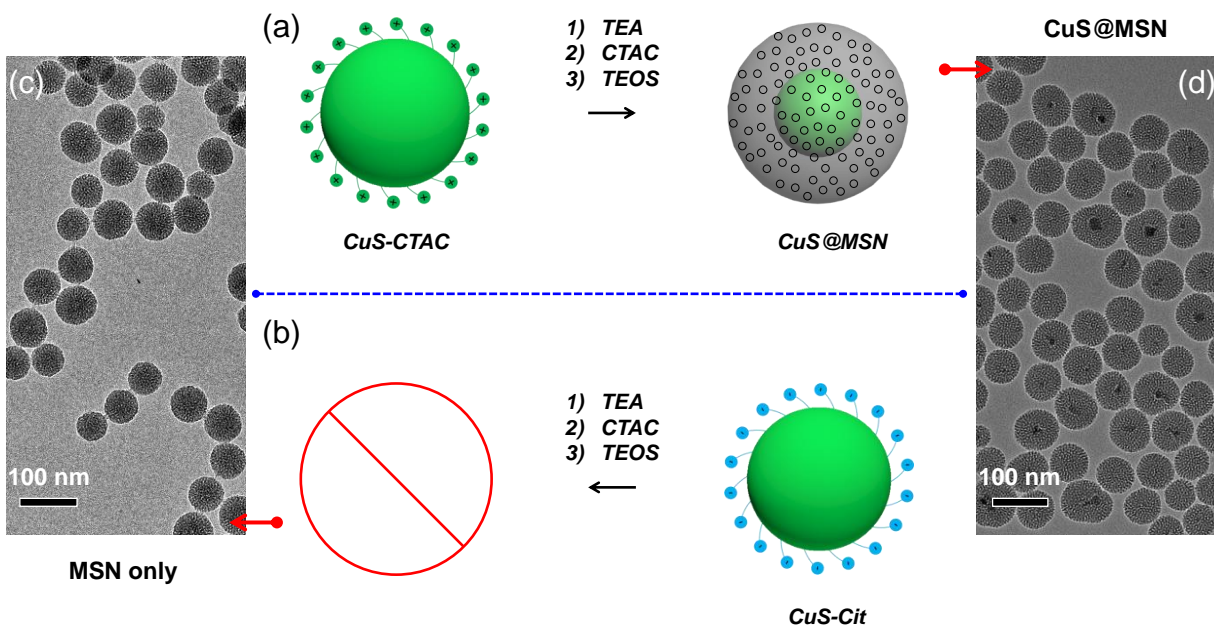

**Figure S2. Impact of surface charge on the synthesis of CuS@MSN.** Schematic illustrations showing the synthesis of CuS@MSN starting from CTAC-capped CuS nanoparticles (a) and sodium citrate capped CuS (b). Corresponding TEM images of CuS@MSN synthesized by using two different protocols.

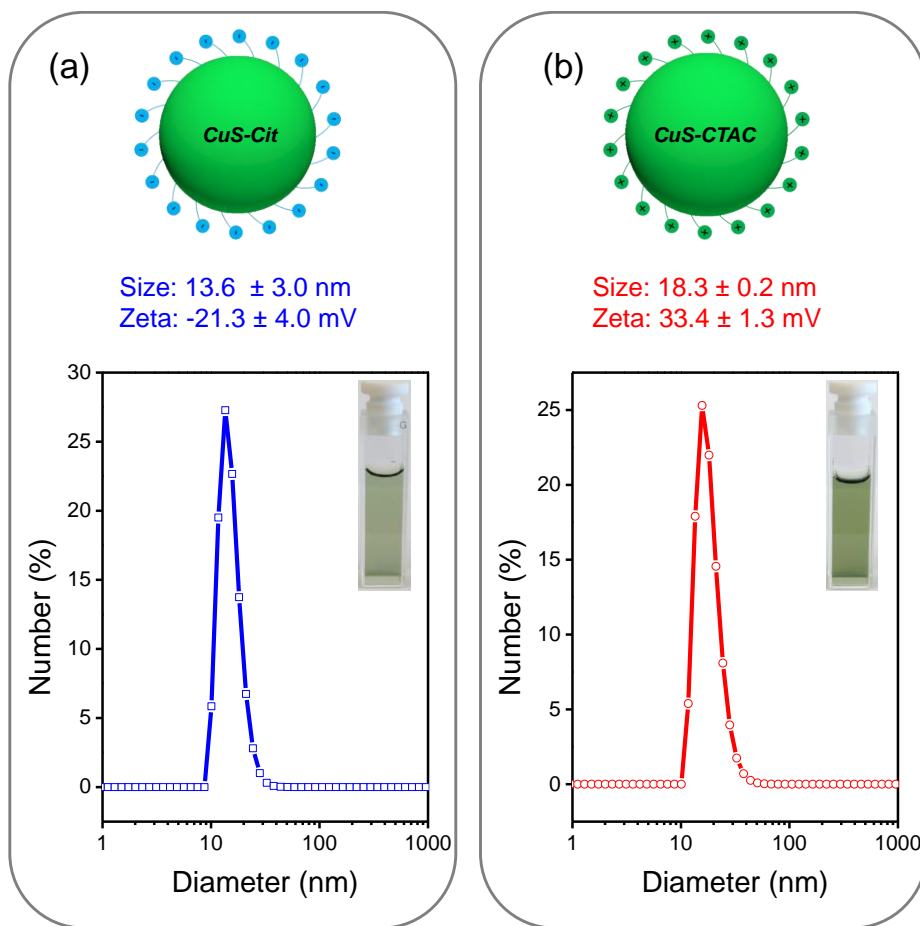

**Figure S3.** Dynamic light scattering (DLS) and zeta potential measurements of CuS-Cit (a) and CuS-CTAC (b).

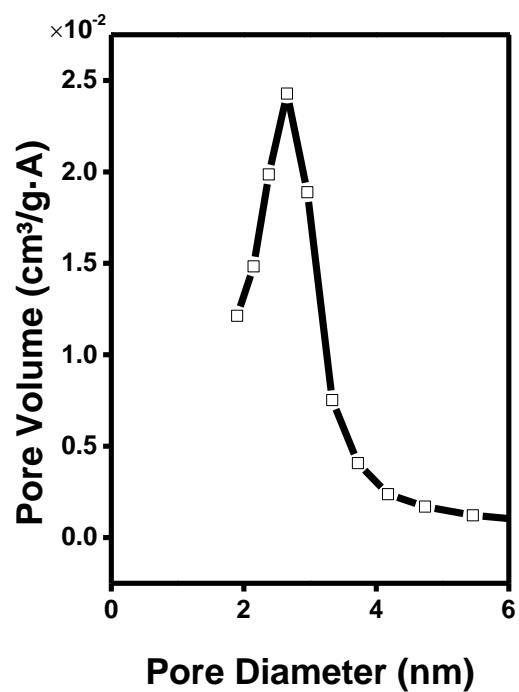

**Figure S4.** Corresponding pore size distribution of CuS@MSN.

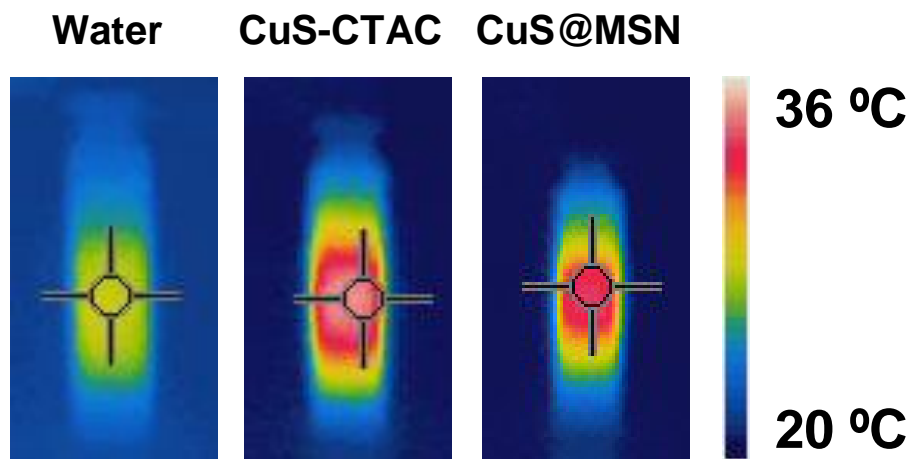

**Figure S5.** Photothermal images of water, CuS-CTAC and CuS@MSN (from left to right).

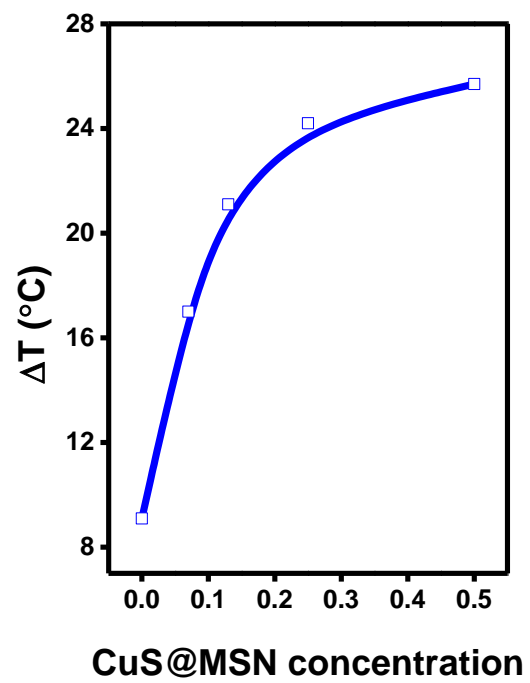

**Figure S6.** Increased temperature for samples with varied CuS@MSN concentrations.

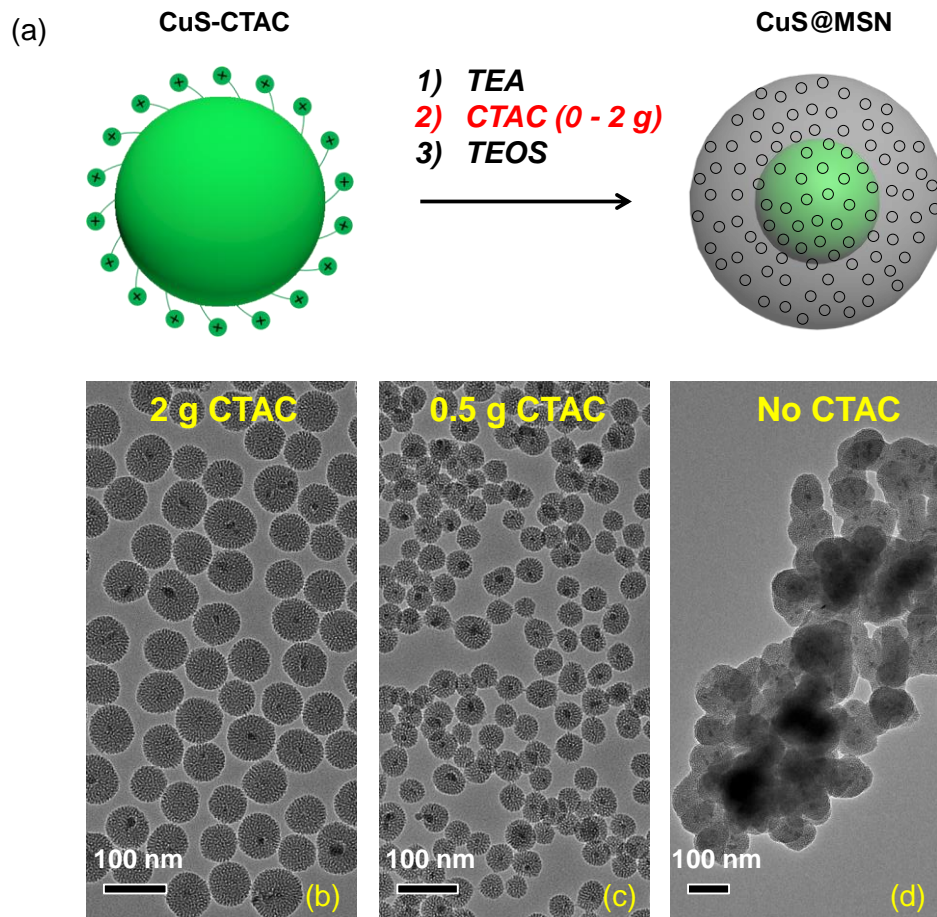

**Figure S7. Impact of extra CTAC amount on the morphology, size, yield and monodispersity of CuS@MSN.** (a) A schematic illustration showing the synthesis of CuS@MSN. TEM images of CuS@MSN synthesized by additionally adding 2 g CTAC (b), 0.5 g CTAC (c) and no extra CTAC (d).

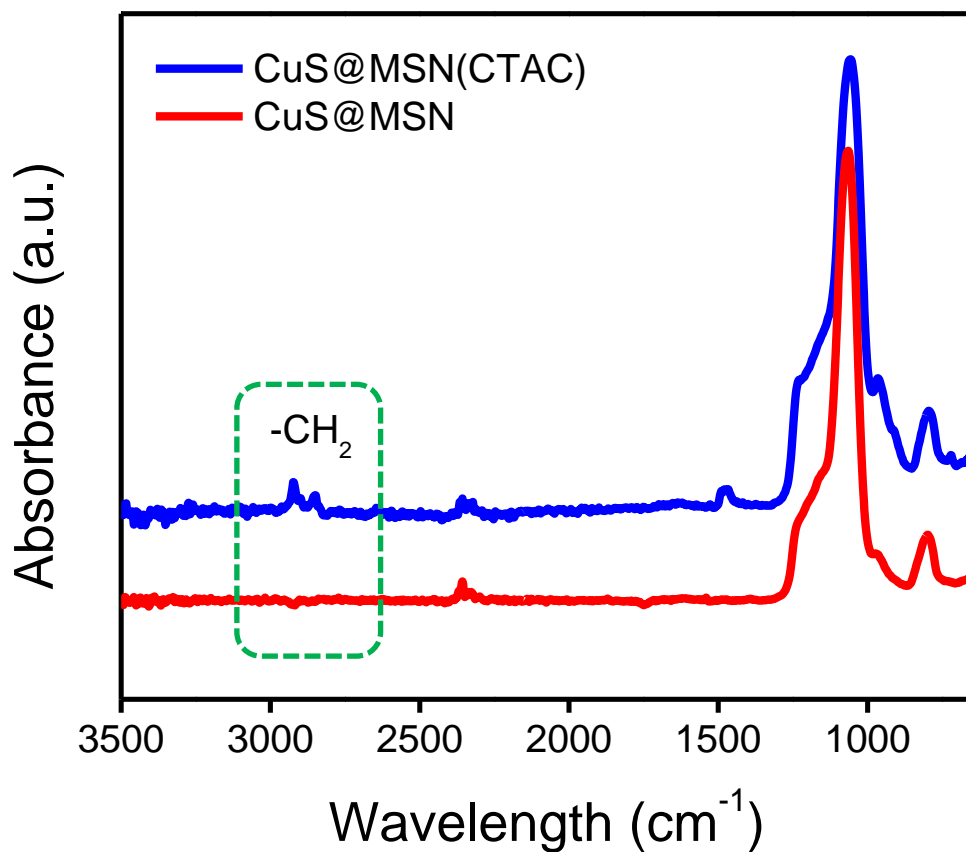

**Figure S8.** Fourier transform infrared spectroscopy spectra of CuS@MSN before (*blue line*) and after (*red line*) the removal of surfactant CTAC. The successful removal of CTAC was evidenced by the absence of characteristic C-H peak in the 3000 ~ 2800 cm<sup>-1</sup> wavelength range for surfactant-extracted sample.



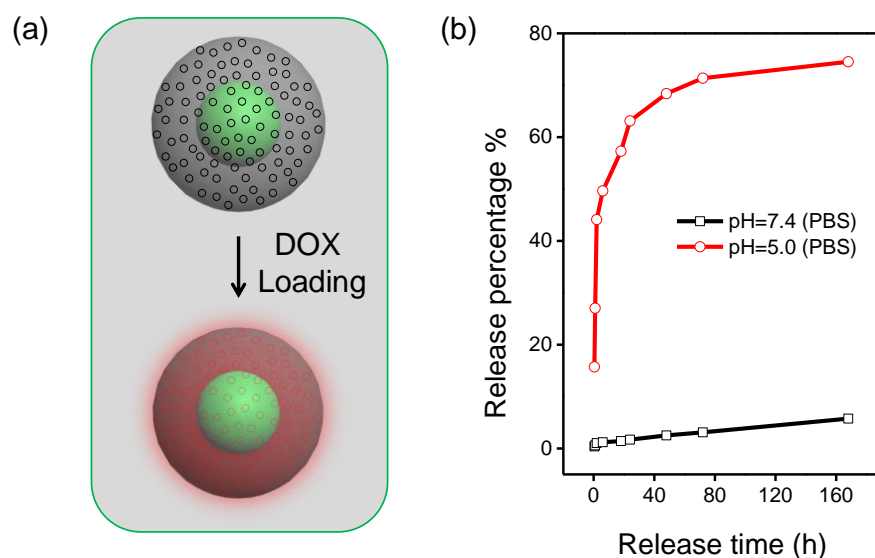

**Figure S9. Anti-cancer drug loading and releasing of CuS@MSN.** (a) A schematic illustration showing the loading of DOX in CuS@MSN. CuS@MSN with a known mass (0.6 mg) was re-suspended in 0.5 mg/mL of DOX-PBS solution (total amount of DOX was 0.3 mg). The mixture was kept under constant shaking for 24 h at room temperature. The DOX loading capacity was found to be 465.1 mg/g. (b) The DOX releasing profiles of CuS@MSN(DOX) under different pH conditions (pH 5.0 and pH 7.4) over 7 days in PBS.

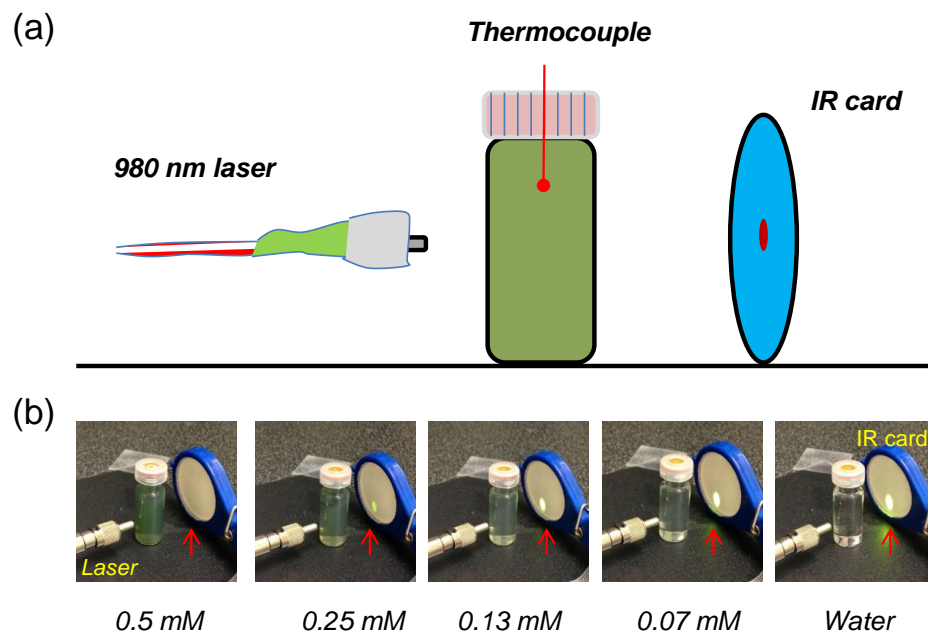

**Figure S10. *In vitro* photothermal effect study.** (a) A schematic illustration showing the setup for quantitative photothermal effect study. (b) Digital photos showing the absorbance of 980 nm light by CuS@MSN nanoparticles with varied concentrations ranging from zero to 0.5 mM.

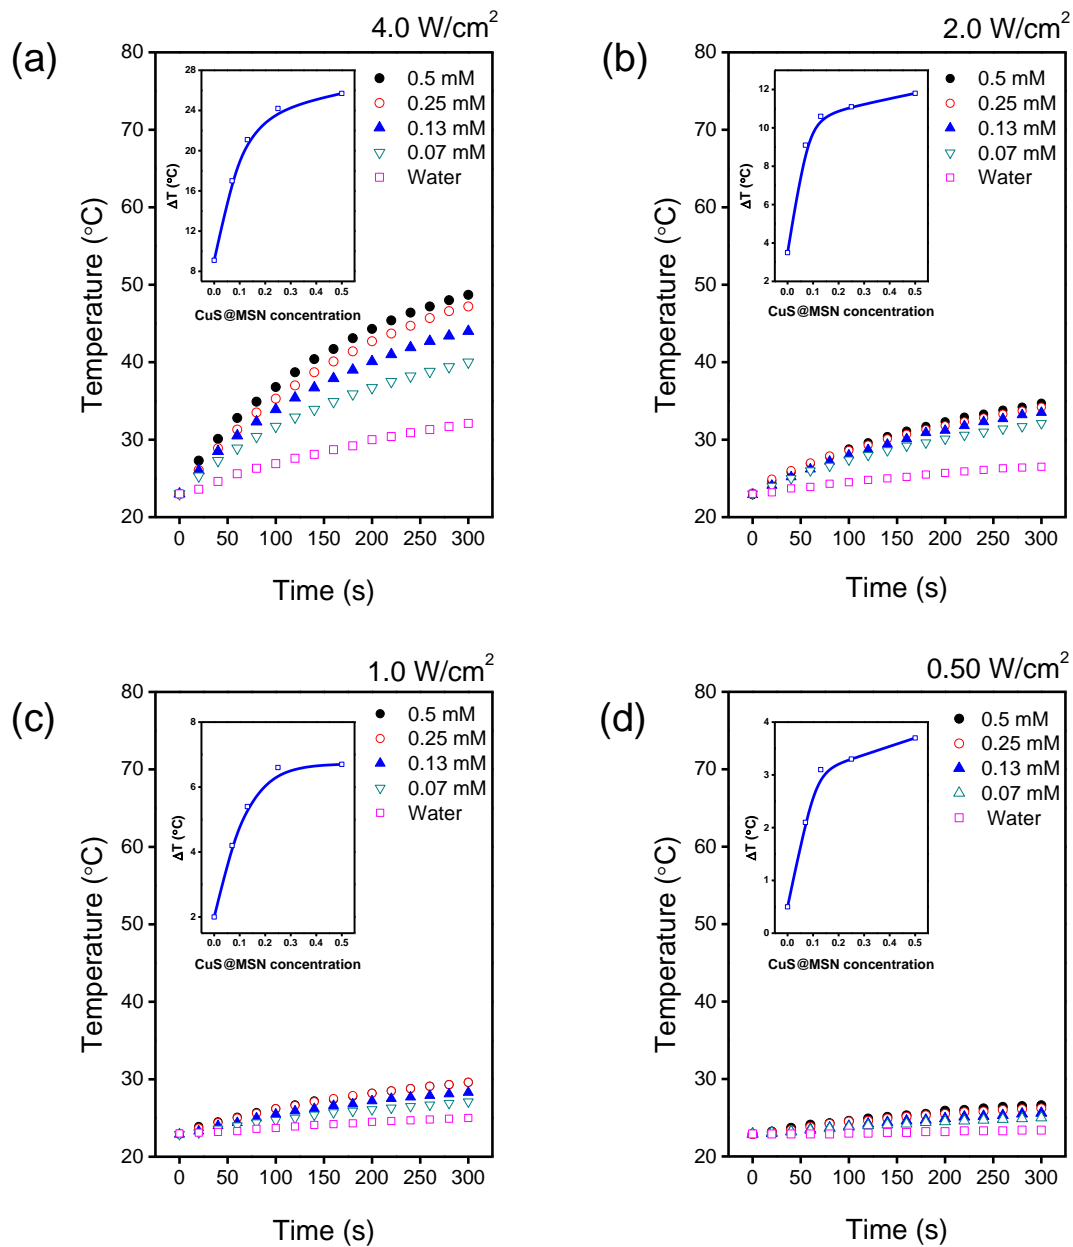

**Figure S11. Photothermal effect study.** Quantitative temperature change of CuS@MSN aqueous solution as a function of 980 nm laser exposure time with varied laser power density (from 0.5 to 4.0 W/cm<sup>2</sup>). Inset shows the increased temperature for samples with varied CuS@MSN concentrations.

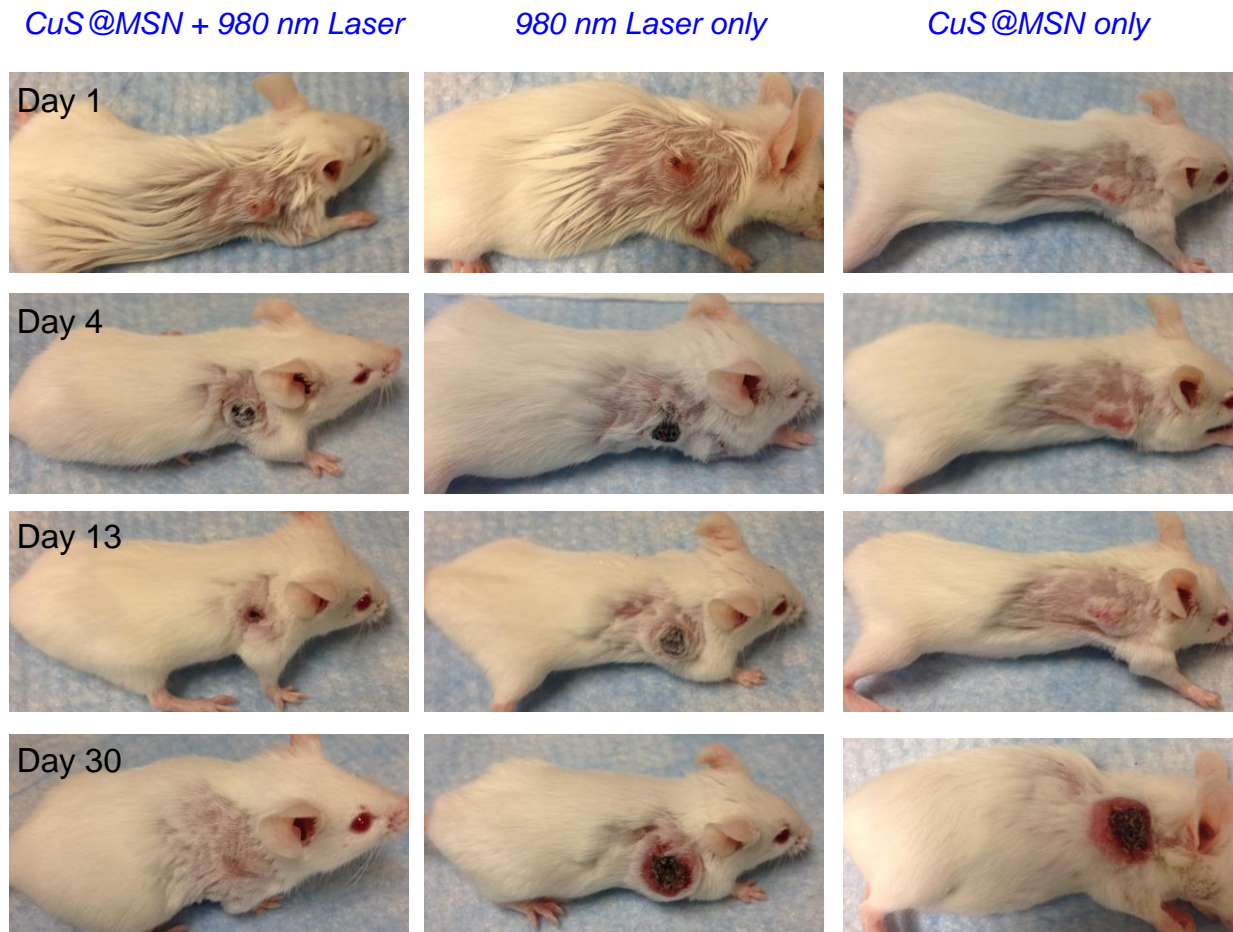

**Figure S12. *In vivo* photothermal ablation evaluation.** Digital photos of mice from 3 different groups after treatment. Left: (*CuS@MSN+980 nm laser*) group; Middle: (*980 nm laser only*) group; Right: (*CuS@MSN only*) group. *CuS@MSN* nanoparticles were intra-tumorally injected into 4T1 tumor-bearing mice at a dose of 33 mg/kg (n=5/group). Laser dose: 4.0 W/cm<sup>2</sup>, 15 min (every 5 min a break).

$^{64}\text{Cu-CuS@MSN-TRC105}$

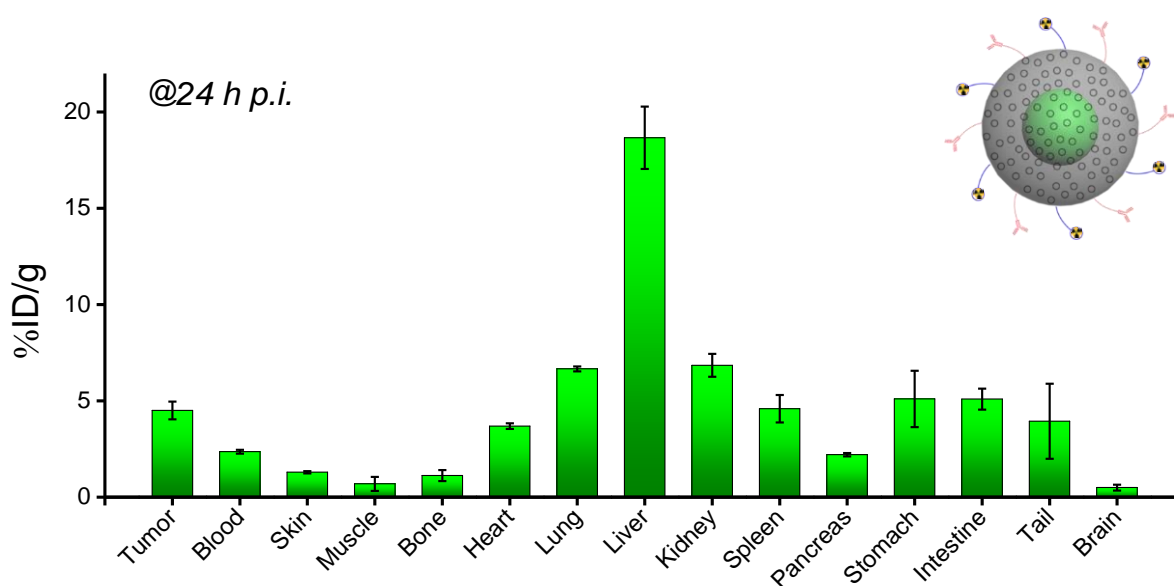

**Figure S13.** Biodistribution of  $^{64}\text{Cu-CuS@MSN-TRC105}$  at 24 h post-injection (dose: ~1 mg/kg; n=3).
